# Supplementary material for: Targeted interventions for patellofemoral pain syndrome (TIPPS): classification of clinical subgroups
Source: PubMed Central journal article supplement — BMJ Open. 2013 Sep 21;3(9):e003795. doi: 10.1136/bmjopen-2013-003795 (PMC3787410; doi:10.1136/bmjopen-2013-003795), 2013-09-21
Supplement: bmjopen-2013-003795.draft_revisions.pdf [file bmjopen-2013-003795.draft_revisions.pdf]

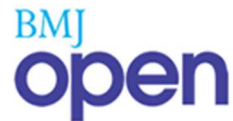

**Targeted Interventions for Patellofemoral Pain (TIPPs):  
classification of clinical sub-groups**

|                                 |                                                                                                                                                                                                                                                                                                                                                                                                                                                                                                                                                                                                                                                                                                                                                                                                                                                                                                                                                                                    |
|---------------------------------|------------------------------------------------------------------------------------------------------------------------------------------------------------------------------------------------------------------------------------------------------------------------------------------------------------------------------------------------------------------------------------------------------------------------------------------------------------------------------------------------------------------------------------------------------------------------------------------------------------------------------------------------------------------------------------------------------------------------------------------------------------------------------------------------------------------------------------------------------------------------------------------------------------------------------------------------------------------------------------|
| Journal:                        | <i>BMJ Open</i>                                                                                                                                                                                                                                                                                                                                                                                                                                                                                                                                                                                                                                                                                                                                                                                                                                                                                                                                                                    |
| Manuscript ID:                  | bmjopen-2013-003795                                                                                                                                                                                                                                                                                                                                                                                                                                                                                                                                                                                                                                                                                                                                                                                                                                                                                                                                                                |
| Article Type:                   | Protocol                                                                                                                                                                                                                                                                                                                                                                                                                                                                                                                                                                                                                                                                                                                                                                                                                                                                                                                                                                           |
| Date Submitted by the Author:   | 13-Aug-2013                                                                                                                                                                                                                                                                                                                                                                                                                                                                                                                                                                                                                                                                                                                                                                                                                                                                                                                                                                        |
| Complete List of Authors:       | <p>Selfe, James; University of Central Lancashire, School of Sport, Tourism and The Outdoors<br/> Callaghan, Michael; Manchester University, Centre for Rehabilitation Science<br/> Witvrouw, Erik; Aspetar, Rehabilitation; Ghent University, Rehabilitation<br/> Richards, Jim; University of Central Lancashire, Allied Health Research<br/> Dey, Maria; University of Central Lancashire, Post Graduate Medicine and Dentistry<br/> Sutton, Chris; University of Central Lancashire, School of Health<br/> Dixon, John; Teesside University, Health and Social Care Institute<br/> Martin, Denis; Teesside University, Health and Social Care Institute<br/> Stokes, Maria; University of Southampton, Faculty of Health Sciences<br/> Janssen, Jessie; University of Central Lancashire, Allied Health Research<br/> Ritchie, Elizabeth; Harrogate and District NHS Foundation Trust, Physiotherapy<br/> Turner, David; University of East Anglia, Health Economics Group</p> |
| <b>Primary Subject Heading</b>: | Rehabilitation medicine                                                                                                                                                                                                                                                                                                                                                                                                                                                                                                                                                                                                                                                                                                                                                                                                                                                                                                                                                            |
| Secondary Subject Heading:      | Sports and exercise medicine                                                                                                                                                                                                                                                                                                                                                                                                                                                                                                                                                                                                                                                                                                                                                                                                                                                                                                                                                       |
| Keywords:                       | Knee < ORTHOPAEDIC & TRAUMA SURGERY, Musculoskeletal disorders < ORTHOPAEDIC & TRAUMA SURGERY, REHABILITATION MEDICINE                                                                                                                                                                                                                                                                                                                                                                                                                                                                                                                                                                                                                                                                                                                                                                                                                                                             |
|                                 |                                                                                                                                                                                                                                                                                                                                                                                                                                                                                                                                                                                                                                                                                                                                                                                                                                                                                                                                                                                    |

SCHOLARONE™  
Manuscripts

1  
2  
3  
4  
5 **Study Protocol:** Targeted Interventions for Patellofemoral Pain (TIPPs):  
6 classification of clinical sub-groups  
7  
8  
9

## 10 **Authors**

11  
12 James Selfe ([jselfe1@uclan.ac.uk](mailto:jselfe1@uclan.ac.uk)) Allied Health Research Unit, UCLan, Preston UK  
13 Michael Callaghan ([michael.callaghan@manchester.ac.uk](mailto:michael.callaghan@manchester.ac.uk)) Centre for Rehabilitation  
14 Science, Manchester University, Manchester, UK  
15 Erik Witvrouw ([Erik.Witvrouw@UGent.be](mailto:Erik.Witvrouw@UGent.be)) Department of Rehabilitation, Ghent University,  
16 Ghent, Belgium & Aspetar, Qatar  
17 James Richards ([JRichards@uclan.ac.uk](mailto:JRichards@uclan.ac.uk)) Allied Health Research Unit UCLan; Preston UK  
18 Maria Paola Dey ([MPDey@uclan.ac.uk](mailto:MPDey@uclan.ac.uk)) Postgraduate Medicine and Dentistry, UCLan,  
19 Preston UK  
20 Chris Sutton ([CJSutton@uclan.ac.uk](mailto:CJSutton@uclan.ac.uk)) School of Health, UCLan, Preston, UK.  
21 John Dixon ([John.Dixon@tees.ac.uk](mailto:John.Dixon@tees.ac.uk)) Health and Social Care Institute, School of Health and  
22 Social Care, Teesside University, Middlesbrough, UK.  
23 Denis Martin ([D.Martin@tees.ac.uk](mailto:D.Martin@tees.ac.uk)) Health and Social Care Institute, School of Health and  
24 Social Care, Teesside University, Middlesbrough, UK.  
25 Maria Stokes ([M.Stokes@soton.ac.uk](mailto:M.Stokes@soton.ac.uk)) Faculty of Health Sciences, University of  
26 Southampton, Southampton, UK.  
27 Jessie Janssen ([JJanssen@uclan.ac.uk](mailto:JJanssen@uclan.ac.uk)) Allied Health Research Unit, UCLan, Preston, UK  
28 Elizabeth Ritchie ([elizabeth.ritchie@hdfn.nhs.uk](mailto:elizabeth.ritchie@hdfn.nhs.uk)) Physiotherapy Department, Harrogate and  
29 District NHS Foundation Trust, Harrogate, UK.  
30 David Turner ([David.A.Turner@uea.ac.uk](mailto:David.A.Turner@uea.ac.uk)) Health Economics Group, University of East  
31 Anglia, Norwich, UK  
32  
33  
34  
35  
36  
37  
38  
39  
40  
41  
42  
43  
44  
45  
46

47 **Correspondence:** James Selfe ([jselfe1@uclan.ac.uk](mailto:jselfe1@uclan.ac.uk)). School of Sport Tourism and The  
48 Outdoors, University of Central Lancashire (UCLan), Preston, PR1 2HE, UK  
49  
50  
51  
52  
53  
54  
55  
56  
57  
58  
59  
60

**Word count:** 3998

### **Key Words**

- Patellofemoral pain
- Targeted intervention
- Sub-groups

## Abstract

### Introduction

Patellofemoral Pain (PFP) can cause significant pain leading to limitations in societal participation and physical activity. An international expert group has highlighted the need for a classification system to allow targeted intervention for patients with PFP; we have developed a work programme systematically investigating this. We have proposed six potential sub-groups: hip abductor weakness, quadriceps weakness, patellar hypermobility, patellar hypomobility, pronated foot posture and lower limb biarticular muscle tightness. We could not uncover any evidence of the relative frequency with which PFP patients fell into these sub-groups or whether these sub-groups were mutually exclusive. The aim of this study is to provide information on the clinical utility of our classification system.

### Methods and Analysis

150 participants will be recruited over 18 months in four NHS physiotherapy departments in England. Inclusion criteria: adults 18-40 years with PFP for longer than three months; PF pain in at least two pre-designated functional activities; PF pain elicited by clinical examination. Exclusion criteria: prior or forthcoming lower limb surgery; co-morbid illness or health condition; lower limb training; or pregnancy. We will record medical history, demographic details, pain, quality of life, psychomotor movement awareness and knee temperature. We will assess hip abductor and quadriceps weakness, patellar hypermobility and hypomobility, foot posture and lower limb biarticular muscle tightness.

The primary analytic approach will be descriptive.

We shall present numbers and percentages of participants who meet the criteria for membership of:

- (i) each of the sub-groups;
- (ii) none of the sub-groups;
- (iii) multiple sub-groups;

Exact (binomial) 95% confidence intervals for these percentages will also be presented.

### Ethics and dissemination

This study has been approved by NRES Committee North West – Greater Manchester North (11/NW/0814) and UCLan BuSH Ethics Committee (BuSH 025). An abstract has been accepted for the 3rd International Patellofemoral Pain Research Retreat, Vancouver, September 2013.

## Article Summary

### Article Focus

- Testing the feasibility of using a clinical practice framework to assign PFP patients into sub-groups
- Assessing the frequency with which PFP patients fall into sub-groups
- Assessing whether sub-groups are mutually exclusive.

### Key Messages

- 101/150 patients recruited to date
- Comprehensive psychosocial assessment of demographic details, pain, quality of life, psychomotor movement awareness and knee temperature. (approximately 20 minutes to complete)
- Clinical assessment of hip abductor and quadriceps weakness, patellar hypermobility, patellar hypomobility, foot posture and lower limb biarticular muscle tightness. (approximately 25 minutes to complete)

### Strengths and Limitations of this study

- Currently the largest RCT sample size is 176 patients our target sample size of 150 patients for this feasibility study indicates the scale and ambition of our programme of work.
- We have also included a comprehensive set of psychosocial and physiological measures as these may also help us to understand differences between potential sub-groups. Traditionally patellofemoral research has focussed on biomechanical, and to some extent pain measures, and has paid little attention to the wider holistic picture of a patient's complaint.
- We have not included an assessment of cost or resource use in this study. Therefore any differential in the resource use of different sub-groups will remain unknown.
- Qualitative methods would enhance the investigation of psychosocial aspects.
- The study is not longitudinal, but importantly will provide key data to inform such studies.

## BACKGROUND

Patellofemoral Pain (PFP) can cause significant pain and dysfunction leading to limitations in societal participation and physical activity. Higher body mass indices and higher than expected levels of disability and psychological morbidity have been observed in patients with PFP [1,2]. A number of studies provide evidence which challenges the common view that PFP is a relatively trivial and self-limiting condition: 91% of patients had pain and dysfunction at a follow up of a minimum of 4 years following diagnosis [3]; 96% reported having problems a mean of 4 years following diagnosis [4]; 73% still had pain at an average of 5.7 years follow up [5]; 94% had on-going problems for on average 16 years following diagnosis [6].

It has also been reported that there is a possibility that PFP predisposes people to osteoarthritis in later life; Stathopulu & Baildam [3] found that 45% of their PFP patients, for whom PFP was the first recorded musculoskeletal problem, were later diagnosed with other arthritic conditions. In a study of people with knee pain aged over 50 years, it was found that 507 (64%) had definite radiographic evidence of patellofemoral osteoarthritis, which suggests that there are specific degenerative processes occurring within the patellofemoral joint, which may not be related to the other articular components of the knee. It is unknown how many of these patients had patellofemoral problems when they were younger [7]. Utting et al, reported that 22% of patients (mean age 67) undergoing uni-compartmental patellofemoral arthroplasty recalled having patellofemoral pain as an adolescent [8]. However, a recent systematic review reported that the link between PFP and patellofemoral osteoarthritis should be interpreted with caution due to the paucity of high quality evidence [9].

PFP is a condition commonly referred for physiotherapy [10] and PFP recently emerged as the 3rd highest ranked topic out of 185 in the Chartered Society of Physiotherapy Musculoskeletal Research Priority Project [11]. In this national survey, there was 94.9% agreement on the importance of PFP with respect to physiotherapy practice, quality of care, cost effectiveness, and public health. The mean number of NHS physiotherapy treatment sessions for patients referred with PFP is reported as eight with the maximum number of sessions reported as 17 [12]. The Cochrane Library lists 4 current reviews [13,14,15,16]; 2 withdrawn reviews [17,18] and 1 protocol [19] which are specific to the conservative management of PFP. Collectively these reviews suggest that there is a weak evidence base for conservative management of PFP, including physiotherapy, mainly due to the poor methodological quality of existing studies. In 2012 we found 52 RCTs recruiting 2667 participants that investigated interventions for PFP, 60% reported results that were not statistically significant. The average sample size was 51 participants and the largest study [20] included 176 participants. As reflected in the number of Cochrane reviews conservative care for PFP is diverse and usually consists of a multimodal package of interventions. The current multimodal approach can include a variety of muscle strengthening and stretching techniques, patellar taping or bracing and foot orthotics. More recent high quality studies [21,22] have proposed that a targeted intervention approach for specific sub-groups of PFP patients may produce improved patient outcomes. Crossley et al [21] also discuss the need for developing PFP patient classification systems so that "*more specific treatment can be designed and evaluated*". The idea of clinically sub-grouping PFP patients and then delivering targeted treatment emerged from the First International PFP

1  
2  
3 Research Retreat [23]. One of the questions posed, as part of the consensus-  
4 building process, was "*Where do we need to go?*" The response was "*Identification*  
5 *of sub-groups of people with PFP is needed. This may be achieved through the use*  
6 *of high quality Randomised Controlled Trials (RCTs), which should only investigate a*  
7 *few potential subgroups for which there is a credible rationale...High quality RCTs for*  
8 *different conservative treatments (e.g. hip muscle retraining, gait re-education) are*  
9 *strongly encouraged. However, these treatments should be targeted to those sub-*  
10 *groups of people who are most likely to benefit"* [23]. The conference proposed  
11 three anatomically based sub-groups, proximal (hip and pelvis), local (patella and  
12 knee factors) and distal (foot and ankle). The same proximal, local and distal sub-  
13 grouping approach was adopted by the Second International PFP Research Retreat  
14 [24]. This sub-grouping provides a rationale for researchers to develop targeted  
15 treatment interventions. However to date there have been no studies which have  
16 further investigated this premise. Interestingly a separate process of international  
17 consensus building about the future direction of research in the field of primary care  
18 musculoskeletal studies has been conducted [25]. This group has also highlighted  
19 the need for future studies to adopt a sub-grouping targeted approach in order to  
20 improve our understanding of the mechanisms underlying musculoskeletal problems  
21 to optimise patient management. They highlight that in previous studies the  
22 heterogeneity of patient samples produces a small treatment effect, which masks a  
23 wide range of individual responses leading to the conclusion that non-  
24 pharmacological interventions in musculoskeletal conditions lead to little patient  
25 benefit.  
26  
27  
28

## 29 **WORK PLAN**

30 We have developed a work programme consisting of a number of phases to  
31 investigate sub-grouping and the targeted intervention approach in PFP. Phase 1:  
32 was the theoretical classification of patients with PFP into distinct clinical groups  
33 based on clinical assessment tests, which could be used to target intervention in  
34 clinical practice, through the development of a clinical practice framework. Phase 2  
35 (the current phase): is developing and testing the feasibility of using a clinical  
36 practice framework to assign PFP patients into sub-groups. Phase 3: Randomised  
37 controlled trial evaluating the cost-effectiveness of using the clinical practice  
38 framework compared to usual care to improve quality of life of patients with PFP.  
39 This will incorporate an internal pilot study, to check assumptions about outcome  
40 variability which will inform sample size estimates.  
41  
42  
43

## 44 **Results of Phase 1: Identification and development of clinical assessment** 45 **tests**

46 We have completed Phase 1 of this work. This was a literature review, evidence  
47 synthesis and clinical mapping undertaken by the TIPPs research team to establish  
48 supporting evidence for the existence of sub-groups. Sub-groups were derived from  
49 the literature which conformed to the following criteria: (1) They could potentially be  
50 identified by simple evidence based clinical assessment tests; (2) The tests could be  
51 used routinely by physiotherapists in a variety of clinical practice settings ranging  
52 from Primary Care facilities to Tertiary Teaching Hospitals; (3) Minimal expertise and  
53 training was required for competent performance of the tests; (4) Any equipment  
54 required for the tests needed to be low cost; (5) Published thresholds for potentially  
55 assigning patients to sub-groups had to be available; (6) Any potential sub-group  
56 then had to be matched to a specific and credible treatment intervention. Using the  
57  
58  
59  
60

1  
2  
3 First International PFP Research Retreat sub-groups as a starting point we found  
4 that there was often more than one clinical problem at the proximal, local and distal  
5 sites, that there were multiple and sometimes complex clinical assessment tests and  
6 multiple interventions. For example proximally at the hip a number of different  
7 strength factors have been proposed [26, 27]. Locally at the patella and knee  
8 patients with proprioceptive deficits have been identified [28, 29], however the  
9 problem with this sub-group is that as yet there are no simple and cheap methods to  
10 accurately identify proprioceptive deficit in clinical centres that do not have access to  
11 dynamometry. Distally at the foot and ankle two clinical prediction rules for the likely  
12 success of orthotic intervention have been proposed, however there is no agreement  
13 between the two studies as to the individual clinical items. The first [30] lists 3 items:  
14 forefoot valgus alignment; great toe extension; navicular drop test and the second  
15 [31] lists 4 different items: age; height; worst pain measured using a visual analogue  
16 scale; mid-foot width difference from weight bearing to non-weight bearing.  
17 Therefore at the end of this work we have proposed 6 rather than 3 sub-groups each  
18 of which has a specific clinical test which yields a score from which a threshold has  
19 previously been published. The threshold scores will be used to assign patients to  
20 sub-group membership (Figure 1). However, the literature was unable to provide any  
21 evidence of the relative frequency with which PFP patients fell into each of these  
22 sub-groups and whether these sub-groups were mutually exclusive. Therefore the  
23 next stage of our developmental work is an investigation of the distribution of  
24 patients into the sub-groups when the clinical assessment tests and subsequent  
25 threshold scores are applied in routine physiotherapy practice (Phase 2). This is the  
26 feasibility study which forms the basis of this paper. The main aims of this feasibility  
27 study are to assess the relative frequency with which patients fall into each of the  
28 sub-groups, and whether or not the sub-groups are mutually exclusive. By the end  
29 of this study we would expect to have greater clarity as to whether all, some or none  
30 of our proposed sub-groups could potentially be useful in clinical practice to form the  
31 basis of targeted treatment.  
32  
33  
34  
35

## 36 **Phase 2: Methods**

### 37 **Research Question**

38 Do clinically important sub-groups of PFP patients exist?

### 39 **Aim of Study**

40 To provide information on the clinical utility of sub-grouping PFP patients.

### 41 **Study Objectives**

42 This study is designed to provide clinical evidence for theoretically derived sub-  
43 groups of PFP patients which may be appropriate for targeted treatment. In this  
44 study we will apply evidence based routine clinical assessment tests to a  
45 representative sample of patients with PFP referred for physiotherapy in order to  
46 examine: i) the relative frequency with which they fall into each of the sub-groups. ii)  
47 whether the sub-groups are mutually exclusive or whether, and how frequently,  
48 patients fall into two or more sub-groups. iii) whether there are any sub-groups  
49 which may not be clinically important in the context of targeted treatment because  
50 insufficient patients fall into these sub-groups. iv) whether patient and clinical  
51 characteristics vary between the sub-groups. The collection of study data will also  
52 allow us to explore the potential for better methods of classifying sub-groups by  
53 including patient and/or clinical characteristics or by the use of different test  
54 thresholds.  
55  
56  
57  
58  
59  
60

### Study design

Observational study, at one time point (commencement of physiotherapy), of adults age 18-40 years with a clinical diagnosis of unilateral or bilateral patellofemoral pain present for longer than three months (For full eligibility criteria see Table 1).

### Setting

Four NHS physiotherapy departments in England; Central Manchester University Hospitals NHS Foundation Trust; Harrogate and District NHS Foundation Trust; Lancashire Care NHS Foundation Trust; NHS Solent.

### Patient recruitment

One hundred and fifty potential participants in total will be recruited over an eighteen month period across the four collaborating centres. A research physiotherapist based within each of the four physiotherapy departments will check eligibility and obtain informed consent. Each patient that agrees to take part will be assessed once only by a research physiotherapist (one at each participating centre). The research assessment for this feasibility study will consist of two parts. Part 1; assessment of demographic, clinical and psychosocial patient characteristics which will take approximately 20 minutes to complete (Table 2). Data will be collected on characteristics known to have an impact on outcome. This data may help us to further understand differences between potential sub-groups or suggest new sub-groups. Previous studies have used some of these tools, however no other study has attempted to systematically investigate psychosocial issues in PFP patients in the comprehensive manner proposed here. Part 2; clinical assessment tests which take approximately 25 minutes to complete (Table 3). Thresholds, for assigning participants to sub-groups, for each test are based on normative data from healthy populations plus or minus 1 standard deviation (Figure 1).

### Clinical assessment tests

*Dynamometer measurement of quadriceps muscle strength* using a Lafayette Manual Muscle Test System (Range: 0-136kg): The participant will be in a seated position and the hips and knees flexed to 90 degrees. Muscle strength of the knee extensors will be assessed with a portable dynamometer mounted against a stabilisation strap positioned perpendicular to the tibia just above the malleoli. The force exerted against the dynamometer in this position will be recorded and the moment arm of this force around the extension/flexion axis of the knee joint will be measured using a tape measure as the distance from the level of the dynamometer on the tibia to the centre of the knee joint (assumed to coincide with the most prominent point on the femoral epicondyle identified via palpation). These two measurements will be used to calculate the maximum knee extensor moment (Nm) during an isometric maximal voluntary contraction (MVC) test as the product of the force in Newtons (N) and moment arm in metres (m) [32]. *Dynamometer measurement of hip abductors muscle strength*: The participant will be in side lying with the tested leg uppermost in the neutral anatomical position. The participant will be asked to abduct their leg sideways (i.e. towards the ceiling) from this position; the portable dynamometer mounted against a stabilisation strap will be held perpendicular to the side of the leg at a level just above the knee joint. To ensure that abductor muscle strength is tested and that the lower limb does not rotate externally, the participants will be instructed to ensure their toes are pointed horizontally during the contraction. The force exerted against the dynamometer in



1  
2  
3 this position will be recorded and the moment arm of this force around the  
4 adduction/abduction axis of the hip joint will be measured using a tape measure as  
5 the distance from the level of the dynamometer on the thigh to the centre of the hip  
6 joint. These two measurements will be used to calculate the maximum hip abductor  
7 moment (Nm) during an MVC test as the product of the force (N) and moment arm  
8 (m) [32]. Strength testing will be performed to assess functional capacity, in  
9 particular we are interested in the relative balance between the Quadriceps and Hip  
10 Abductors. This simple clinical test procedure will not enable the peripheral and  
11 central components of muscle dysfunction to be identified but will provide a useful  
12 indication of contractile performance. *Patellar glide*: With the participants in supine,  
13 the quadriceps muscles relaxed and the knees in extension, the clinician will apply a  
14 medially and then a laterally directed force to the patella. The total displacement of  
15 the pole of the patella will be recorded in millimetres in the coronal plane [33].  
16 *Passive knee extension (Hamstrings length)*: The participant will be positioned  
17 supine on a plinth. The lower limb not being tested will be positioned in hip and knee  
18 extension. The research physiotherapist will position the hip and knee of the tested  
19 side in 90° of flexion, thus marking the starting position for the test. With one hand  
20 supporting the participant's distal thigh and the other hand cupping the heel, the  
21 research physiotherapist will passively extend the knee until firm resistance is  
22 elicited. At this point the angle of the tibia is recorded with a digital inclinometer [34].  
23 *Passive prone knee bend (Quadriceps length)*: The participant will be positioned  
24 prone lying on the edge of a plinth so that the foot on the non-involved side will be  
25 placed on the floor at 90° hip flexion. The knee of the tested leg will be passively  
26 maximally flexed until resistance or discomfort is elicited. In this position the angle of  
27 the tibia will be recorded with a digital inclinometer [33]. *Standing method for*  
28 *assessing calf flexibility*: The length of the gastrocnemius muscle will be obtained by  
29 having the participant lean on a solid support 0.6m away with the tested leg behind  
30 the contralateral leg and keeping the knee of the tested leg extended. The  
31 participants will be instructed to maximally flex their tested ankle while keeping their  
32 heel on the floor. The angle of the tibia is recorded relative to vertical with a digital  
33 inclinometer [33]. *Foot posture index (FPI)*: There are six component assessments:  
34 1. Talar head position, 2. Supra and infra-lateral malleolar curvature, 3. Calcaneal  
35 frontal plane position, 4. Prominence in the region of the talonavicular joint, 5.  
36 Congruence of the medial longitudinal arch, 6. Abduction/adduction of the forefoot on  
37 the rearfoot. Each of the component assessments or observations are graded 0 for  
38 neutral, with scores of -2 for clear signs of supination and +2 for clear signs of  
39 pronation. Unless the criteria outlined for each of the features are clearly met then  
40 the more conservative score will be awarded. When the scores are combined, the  
41 aggregate value gives an estimate of the overall foot posture. Large positive  
42 aggregate values indicate a pronated posture [35].  
43  
44  
45  
46  
47

### 48 **Training of research therapists**

49 All research physiotherapists will undertake a full day training session during the first  
50 month of the study, when they will be provided with training on the research  
51 processes and on how to undertake the standardised clinical assessment tests.  
52 During the training sessions, all the therapists will be observed by the PI and Dr  
53 Callaghan performing each of the clinical test procedures and provided with peer  
54 feedback. Inter-therapist variability will be examined during these sessions and  
55 although it will not be possible to conduct a formal inter-rater reliability assessment  
56 during the training it will provide an opportunity to observe any variability in  
57  
58  
59  
60

1  
2  
3 performance and address it. All the physiotherapists will be provided with a  
4 comprehensive manual including the standard operating procedures, along with a  
5 data recording proforma.  
6

### 7 **Sample size**

8 Given the nature of the study, power calculations are not applicable. One hundred  
9 and fifty participants will enable us to estimate, with 95% confidence, the numbers  
10 and percentages of participants who meet the criteria for membership of: (i) each of  
11 the 6 sub-groups individually; (ii) none of the sub-groups; (iii) multiple sub-groups (for  
12 each represented sub-group combination) to within  $\pm 7.5\%$  for well-represented (30%  
13 prevalence) sub-groups and to within  $\pm 3.5\%$  for sparse (5%prevalence) sub-groups  
14 (or multiple sub-groups).  
15  
16

### 17 **Analysis Plan**

18 As the main purpose of the study is to describe the distribution of PFP patients into  
19 the different sub-groups following application of the clinical assessment test criteria,  
20 including whether patients meet the criteria for multiple sub-groups or fail to meet the  
21 criteria for any of the sub-groups, the primary analytic approach will be descriptive.  
22 We shall present numbers and percentages of participants who meet the criteria for  
23 membership of:  
24

25 (i) each of the 6 sub-groups individually;

26 (ii) none of the sub-groups;

27 (iii) multiple sub-groups (for each represented sub-group combination).

28 Exact (binomial) 95% confidence intervals for these percentages will also be  
29 presented. We shall also present descriptive statistics (mean [SD], median [IQR],  
30 count [%], as appropriate) of the patient characteristics for each sub-group (including  
31 the no clinical sub-group) to indicate how these characteristics vary across sub-  
32 groups. The data will also enable some further exploratory analyses to be  
33 performed. The nature of these analyses will depend on the patterns of the  
34 distribution of participants into sub-groups. However, we expect that they will include  
35 an exploration of the sensitivity of the distribution of sub-group membership to the  
36 choices of thresholds, particularly if substantial numbers of patients fall into either  
37 multiple sub-groups or no sub-group; they are also likely to include explorations of  
38 the joint effects of patient characteristics on the distribution of patients into sub-  
39 groups, using techniques including multiple logistic regression. Demographic,  
40 clinical and psychosocial characteristics as previously described may also be  
41 included as covariates in later exploratory model-based analyses.  
42  
43  
44

### 45 **DISCUSSION**

46 Recent literature has strongly promoted the idea of sub-grouping PFP patients and  
47 delivering targeted treatment, as it is believed that this may be more beneficial than  
48 the current multimodal therapeutic approaches [20,21,22]. Despite these  
49 recommendations, this premise has not yet been investigated. The main aims of this  
50 feasibility study are therefore to assess the relative frequency with which patients fall  
51 into each of the sub-groups, and whether or not the sub-groups are mutually  
52 exclusive.  
53  
54

55 As outlined above, the study has a number of strengths and addresses key gaps in  
56 current knowledge. It is ambitious in terms of both scale and scope. There is often  
57 controversy and lack of consensus within the field of patellofemoral research, due to  
58  
59  
60

1  
2  
3 two related factors associated with the nature of the current evidence base. Firstly  
4 there are a relatively large number of normative data studies conducted on very  
5 small samples of healthy subjects that do little to enhance our understanding of this  
6 complex chronic condition [36]. Secondly, as already discussed, there is a limited  
7 number of high quality, large scale clinical trials. Set against this context, where  
8 currently the largest RCT sample size is 176 patients [20], our target sample size of  
9 150 patients for this feasibility study indicates the scale and ambition of our  
10 programme of work. In terms of the scope of this study, we have also included a  
11 comprehensive set of psychosocial and physiological measures as these may also  
12 help us to understand differences between potential sub-groups. Traditionally  
13 patellofemoral research has focussed on biomechanical, and to some extent pain  
14 measures, and has paid little attention to the wider holistic picture of a patient's  
15 complaint. One study has indicated that psychological morbidity may be important in  
16 PFP [2]. The more comprehensive data being obtained in the present study will  
17 provide us with a unique insight into the patient's experience of the condition which  
18 may also help further our understanding of future treatment options. There are also  
19 potential limitations in the scope of this study. We have not included an assessment  
20 of cost or resource use in this study. Therefore any differential in the resource use  
21 of different sub-groups will remain unknown; we plan to address this in Phase 3 of  
22 our programme of work. In the current feasibility study, there is however, a health  
23 economics component as we are collecting EQ-5D-5L data so we will gain some  
24 insight into the potential health consequences of different sub-groups. Qualitative  
25 methods would enhance the investigation of psychosocial aspects. We envisage  
26 using mixed methods, as well as more patient and public involvement in subsequent  
27 studies. The study is not longitudinal, but importantly will provide key data to inform  
28 such studies. The results of the present study are expected in 2014. They will  
29 provide answers to a number of questions about the validity and relevance of sub-  
30 grouping in PFP in clinical practice, and will inform future trials.

### 34 35 **STATUS**

36 The study has currently recruited 101/150 patients and is scheduled to be completed  
37 by 29/11/13.

### 38 39 **ETHICS**

40 This study has been approved by NRES Committee North West – Greater  
41 Manchester North, REC reference: 11/NW/0814 and UCLan BuSH Ethics Committee  
42 Reference Number: BuSH 025. All relevant Research and Governance approvals  
43 have been secured at the 4 NHS Trusts where data collection is taking place and all  
44 licenses obtained for the questionnaire instruments where required.

### 45 46 47 **AUTHORS CONTRIBUTIONS**

48 JS, JR, EW, MC, ER contributed to study conception, design and attained project  
49 funding. PD,CS, JD, DM, MS, DT contributed to study design and attained project  
50 funding. JJ contributed to project management and study design. All authors  
51 contributed to manuscript preparation and have read and approved the final  
52 manuscript.  
53  
54  
55  
56  
57  
58  
59  
60

## ACKNOWLEDGEMENTS

### Study Funding

This work was supported by Arthritis Research UK [grant number 19950] and involves collaboration with the Arthritis Research UK Centre for Sport, Exercise and Osteoarthritis. Arthritis Research UK Musculoskeletal Pain CSG, also funded a Think Tank meeting where our research group consisting of academics with expertise in patellofemoral pain, biomechanists, psychosocial aspects related to injury rehabilitation adherence, experts in neuromuscular function, patient representative and practising physiotherapists started to review the literature to identify clinical groups. This Think Tank meeting also allowed us to develop plans for studies investigating the sub-grouping and targeted intervention approach.

We thank the following physiotherapists for performing the research assessments Steve Hill, Stephen Kirk, Gary McCall, Christine Dewsbury and Sophie Chatwin. We would also like to thank the following service managers for their support Keith Mills, Elaine Nicholls, Barbara Sharp, Chantel Ostler and Kim Patterson.

The full TIPPs Research team are James Selfe, Jim Richards, Paola Dey, Chris Sutton, Jessie Janssen, Russell Hogarth (all UCLan), Michael Callaghan (Manchester University), Erik Witvrouw (Ghent University & Aspetar, Qatar), John Dixon & Denis Martin (Teesside University), Maria Stokes (University of Southampton), Nigel Arden (University of Oxford), Elizabeth Ritchie (Harrogate and District NHS Foundation Trust), Bill Baltzopoulos (Brunel University), David Turner (University of East Anglia), Rich Masters (Hong Kong University), Remco Polman (Victoria University, Melbourne, Australia).

### Competing interests

The authors declare that they have no competing interests.

### Data sharing

No unpublished data have been produced

## REFERENCES

1. Clark DI, Downing N, Mitchell J et al: Physiotherapy for Anterior Knee Pain: a Randomised Controlled Trial. *Ann Rheum Dis* 2000;**59**:700-704.
2. Jensen R, Hystad T, Baerheim A: Knee function and pain related to psychological variables in patients with long-term patellofemoral pain syndrome. *JOSPT* 2005;**35**: 594-600.
3. Stathopulu E, Baildam E: Anterior knee pain: a long-term follow-up. *Rheumatology* 2003;**42**:380-382.
4. Price AJ, Jones J, Allum R: Chronic traumatic anterior knee pain injury. *International Journal of the Care of the Injured* 2000;**31**:373-378
5. Blond L, Hansen L: Patellofemoral pain syndrome in athletes: a 5.7 year retrospective follow-up study of 250 athletes. *Acta Orthopaedica Belgica* 1998;**64**: 393–400.
6. Sandow MJ, Goodfellow JW: The natural history of anterior knee pain in adolescents. *J Bone Jt Surg (Br)* 1985;**67**:36–38.
7. Peat G, Thomas E, Handy J, et al: The Knee Clinical Assessment Study – CAS(K). A prospective study of knee pain and knee osteoarthritis in the general population: baseline recruitment and retention at 18 months. *BMC Musculoskeletal Disorders* 2006;**7**:30.
8. Utting MR, Davies GJ, Newman JH: Is anterior knee pain a predisposing factor to patellofemoral osteoarthritis? *The Knee* 2005;**12**: 362-365.
9. Thomas M, Wood L, Selfe J, et al: Anterior knee pain in younger adults as a precursor to subsequent patellofemoral osteoarthritis: a systematic review. *BMC Musculoskeletal Disorders* 2010;**11**: 201.

- 1  
2  
3 10. Callaghan MJ, Selfe J: Has the Prevalence of Patellofemoral Pain in the  
4  
5 General Population in the United Kingdom Been Properly Evaluated? *Physical*  
6  
7 *Therapy in Sport* 2007;**8**: 37-43.
- 8  
9  
10 11. CSP: *Physiotherapy Research Priority Project: Musculoskeletal Topics*.  
11  
12 Chartered Society of Physiotherapy, London;2010.
- 13  
14 12. Brown J: Physiotherapists Knowledge of Patellofemoral Pain Syndrome.  
15  
16 *British Journal of Therapy and Rehabilitation* 2000;**7**:346-353.
- 17  
18 13. Hossain M, Alexander P, Burls A, et al: Foot orthoses for patellofemoral pain in  
19  
20 adults. *Cochrane Database of Systematic Reviews* 2011;**1**.
- 21  
22 14. Callaghan MJ, Selfe J: Patellar taping for patellofemoral pain syndrome in  
23  
24 adults *Cochrane Database of Systematic Reviews* 2012;**3**.
- 25  
26 15. Heintjes EM, Berger M, Bierma-Zeinstra SMA, et al: Pharmacotherapy for  
27  
28 patellofemoral pain syndrome. *Cochrane Database of Systematic Reviews*  
29  
30 2004;**3**.
- 31  
32 16. Heintjes EM, Berger M, Bierma-Zeinstra SMA, et al: Exercise therapy for  
33  
34 patellofemoral pain syndrome. *Cochrane Database of Systematic Reviews*  
35  
36 2003;**4**.
- 37  
38 17. Brosseau L, Casimiro L, Welch V, et al: Therapeutic ultrasound for treating  
39  
40 patellofemoral pain syndrome. *Cochrane Database of Systematic Reviews*  
41  
42 2001;**4**.
- 43  
44 18. D'hondt NE, Aufdemkampe G, Kerkhoffs G, et al: Orthotic devices for treating  
45  
46 patellofemoral pain syndrome. *Cochrane Database of Systematic Reviews*  
47  
48 2009;**1**.
- 49  
50  
51  
52  
53  
54  
55  
56  
57  
58  
59  
60

- 1  
2  
3 19. van der Heijden RA, Lankhorst N, van Linschoten R, et al: Exercise for  
4  
5 treating patellofemoral pain syndrome. *Cochrane Database of Systematic*  
6  
7 *Reviews* 2013;**2**.  
8  
9  
10 20. Collins N, Crossley K, Darnell R, et al: Foot orthoses and physiotherapy in the  
11  
12 treatment of patellofemoral pain syndrome: randomised clinical trial. *BMJ*  
13  
14 2008; **337**: a1735.  
15  
16 21. Crossley K, Bennel K, Green S, et al: Physical therapy for patellofemoral pain.  
17  
18 A randomized double blinded placebo controlled trial. *American Journal of*  
19  
20 *Sports Medicine* 2002;**30**:857-865.  
21  
22  
23 22. Syme G, Rowe P, Martin D, et al: Disability in patients with chronic  
24  
25 patellofemoral pain syndrome: A randomised controlled trial of VMO selective  
26  
27 training versus general quadriceps training. *Manual Therapy* 2009;**14**:252-  
28  
29 263.  
30  
31  
32 23. Davis I, Powers C: Patellofemoral Pain Syndrome: Proximal, Distal, and Local  
33  
34 Factors. An International Retreat. *JOSPT* 2010;**40**:A1-48.  
35  
36  
37 24. Powers C, Bolgla LA, Callaghan MJ, et al: Patellofemoral Pain: Proximal,  
38  
39 Distal, and Local Factors, 2nd International Research Retreat. *JOSPT*  
40  
41 2012;**42**:A1-54.  
42  
43 25. Foster NE, Dziedzic KS, van der Windt DAWM, et al: Research priorities for  
44  
45 non-pharmacological therapies for common musculoskeletal problems:  
46  
47 nationally and internationally agreed recommendations. *BMC Musculoskeletal*  
48  
49 *Disorders* 2009;**10**: 3.  
50  
51  
52 26. Ireland ML, Willson JD, Ballantyne BT, et al: Hip strength in females with and  
53  
54 without patellofemoral pain. *JOSPT* 2003;**33**:671-676.  
55  
56  
57  
58  
59  
60

- 1  
2  
3 27. Bolgia L, Malone T, Umberger B, et al: Hip strength and knee kinematics  
4 during stair descent in females with and without patellofemoral pain  
5 syndrome. *JOSPT* 2008;**38**: 12-18.  
6  
7  
8  
9  
10 28. Baker V, Bennell K, Stillman B, et al: Abnormal knee joint position sense in  
11 individuals with patellofemoral pain syndrome. *Journal of Orthopaedic*  
12 *Research* 2002;**20**:208-214.  
13  
14  
15  
16 29. Callaghan M, Selfe J, McHenry A, et al: Effects of patellar taping on knee joint  
17 proprioception in patients with patellofemoral pain syndrome. *Manual Therapy*  
18 2008;**13**:192-199.  
19  
20  
21  
22  
23 30. Sutlive T, Mitchell S, Maxfield S, et al: Identification of individuals with  
24 patellofemoral pain whose symptoms improved after a combined programme  
25 of foot orthosis use and modified activity: A preliminary investigation. *Physical*  
26 *Therapy* 2004;**84**:49-61.  
27  
28  
29  
30  
31  
32 31. Vincenzino B, Collins N, Cleland J, et al: A clinical prediction rule for  
33 identifying patients with patellofemoral pain who are likely to benefit from foot  
34 orthoses: A preliminary determination. *Br J Sports Med* 2010;**44**:862–866.  
35  
36  
37  
38 32. Maffiuletti NA: Assessment of hip and knee muscle function in orthopaedic  
39 practice and research. *The Journal of bone and joint surgery, American*  
40 *Volume* 2010;**92**: 220-229.  
41  
42  
43  
44  
45 33. Witvrouw E, Lysens R, Bellemans J, et al: Intrinsic risk factors for the  
46 development of anterior knee pain in an athletic population: a two year  
47 prospective study. *The American Journal of Sports Medicine* 2000;**28**:480-  
48 489.  
49  
50  
51  
52  
53  
54 34. Youdas JW, Krause DA, Hollman JH, et al: The influence of gender and age  
55 on hamstring muscle length in healthy adults. *JOSPT* 2005;**35**:246-52.  
56  
57  
58  
59  
60



- 1  
2  
3 35. Redmond AC, Crane YZ, Menz HB: Normative values for the Foot Posture  
4 Index. *Journal of Foot and Ankle Research* 2008;**1**:1-9.  
5  
6  
7 36. Herrington L, Malloy S Richards J: The effect of patella taping on vastus  
8 medialis oblique and vastus lateralis EMG activity and knee kinematic  
9 variables during stair descent. *Journal of Electromyography and Kinesiology*  
10 Volume 2005;**15**:604-607.  
11  
12 37. Cook C, Hegedus E, Hawkins R, et al: Diagnostic accuracy and association to  
13 disability of clinical test findings associated with patellofemoral pain  
14 syndrome. *Physiotherapy Canada* 2010;**62**:17-24.  
15  
16 38. Short last 7 days self-administered version of the IPAQ.  
17 [[https://sites.google.com/site/theipaq/questionnaire\\_links](https://sites.google.com/site/theipaq/questionnaire_links)] (accessed 12  
18 August 2013).  
19  
20 39. Selfe J, Harper L, Pedersen I, et al: Four outcome measures for  
21 patellofemoral joint problems: Part 1 Development and Validity.  
22 *Physiotherapy* 2001;**87**:507-515.  
23  
24 40. Melzack R: SF-MPQ-2 ©: The Initiative on Methods, Measurement, and Pain  
25 Assessment in Clinical Trials (IMMPACT). [[www.immpact.org](http://www.immpact.org).] (accessed 12  
26 August 2013).  
27  
28 41. Bennett MI, Smith BH, Torrance N, et al: The S-LANSS Score for Identifying  
29 Pain of Predominantly Neuropathic Origin: Validation for use in Clinical and  
30 Postal Research. *The Journal of Pain* 2005;**6**:149-158.  
31  
32 42. WHO Disability Assessment Schedule 2.0  
33 [<http://www.who.int/classifications/icf/whodasii/en/index.html>] accessed 12  
34 August 2013).  
35  
36 43. EQ-5D [<http://www.euroqol.org/home.html>] accessed 12 August 2013).  
37  
38  
39  
40  
41  
42  
43  
44  
45  
46  
47  
48  
49  
50  
51  
52  
53  
54  
55  
56  
57  
58  
59  
60

- 1  
2  
3 44. Derogatis LR, Lipman R, Rickels K, et al: The Hopkins Symptom Checklist  
4  
5 (HSCL): A self-report symptom inventory. *Behavioural Science* 1974;**19**:1-15.  
6  
7 45. Masters RSW, Eves FF, Maxwell J: Development of a movement specific  
8  
9 reinvestment scale. In *Proceedings of the ISSP 11th World Congress of Sport*  
10  
11 *Psychology: 14–19 August 2005; Sydney*. Edited by Morris T, Terry P, Gordon  
12  
13 S, Hanrahan S, Levleva L, Kolt G, Tremayne P.  
14  
15  
16 46. Selfe J, Sutton C, Hardaker N, et al: Anterior knee pain and cold knees: A  
17  
18 possible association in women *The Knee* 2010;**17**:319–323.  
19  
20  
21  
22  
23  
24  
25  
26  
27  
28  
29  
30  
31  
32  
33  
34  
35  
36  
37  
38  
39  
40  
41  
42  
43  
44  
45  
46  
47  
48  
49  
50  
51  
52  
53  
54  
55  
56  
57  
58  
59  
60

**Table 1: Eligibility criteria [22,37]****Inclusion criteria**


---

Males and females age 18-40 years able to give informed written consent

---

Clinical diagnosis of unilateral or bilateral patellofemoral pain longer than three months

---

Anterior or retropatellar pain reported on at least two of the following activities:  
prolonged sitting, ascending or descending stairs, squatting, running, kneeling, and  
hopping/jumping

---

In addition to the above, at least two of the three following clinical examination findings:

- pain during resisted isometric quadriceps contraction
  - pain with palpation of the posterior borders of the patella
  - pain during squatting
- 

**Exclusion criteria**


---

Previous knee surgery & subjects awaiting surgery for another lower limb joint problem(s).

---

Ligamentous instability and/or internal derangement

---

History of patella subluxation or dislocation

---

Joint effusion when the mid-patellar girth is 5% or more than the non-involved knee

---

True knee joint locking and/or giving way

---

Coexistent acute illness or chronic disease

---

Bursitis, patella or iliotibial tract tendinopathy, Osgood Schlatter's disease, Sinding-Larsen

Johansson Syndrome, muscle tears or symptomatic knee plicae

---

Subjects already involved in active lower limb training programs.

---

Pregnancy or breast feeding.

---

**Table 2 Patient Characteristics Assessment**

| <b>Domain</b>                            | <b>Questionnaire / items</b>                                                                                                                                                                                                                                  |
|------------------------------------------|---------------------------------------------------------------------------------------------------------------------------------------------------------------------------------------------------------------------------------------------------------------|
| <b>Clinical characteristics</b>          | time since onset<br>previous treatment<br>history of trauma<br>physical activity (International Physical Activity Questionnaire IPAQ) [38]<br>physical functioning (Modified Functional Index Questionnaire (MFIQ) [39])                                      |
| <b>Socio-demographic characteristics</b> | Age<br>gender                                                                                                                                                                                                                                                 |
| <b>Anthropometry</b>                     | height<br>weight<br>body mass<br>leg length<br>skin fold over the patellae                                                                                                                                                                                    |
| <b>Psychosocial</b>                      |                                                                                                                                                                                                                                                               |
| Pain measures                            | Nociceptive Pain<br>Short Form McGill Pain Questionnaire (SF-MPQ-2) [40]<br>Numeric Pain Rating Scale (NPRS) for average pain during the past week<br><br>Neuropathic Pain<br>Leeds Assessment of Neuropathic Symptoms and Signs (S-LANSS) questionnaire [41] |
| Quality of life                          | WHO Disability Assessment Scale 2 (WHODAS 2.0) [42]<br>EQ-5D-5L [43]<br>Hopkins Symptom Checklist 25 (HSCL-25) [44]                                                                                                                                           |
| Psycho-motor movement awareness          | Movement Specific Reinvestment Questionnaire [45]                                                                                                                                                                                                             |
| <b>Physiological parameters</b>          | Self-reported indicators of cold knees [46]<br>skin temperature measurement (over centre of patella & muscle belly of tibialis anterior)                                                                                                                      |

**Table 3: Clinical Assessment Tests**

| <b>Proposed Clinical Group</b>                 | <b>Test</b>                                                                                      |
|------------------------------------------------|--------------------------------------------------------------------------------------------------|
| <b>Hip Abductor weakness</b>                   | Hand Held Dynamometry [32]                                                                       |
| <b>Quadriceps weakness</b>                     | Hand Held Dynamometry [32]                                                                       |
| <b>Patellar Hypomobility</b>                   | Patellar Glide Test [33]                                                                         |
| <b>Patellar Hypermobility</b>                  | Patellar Glide Test [33]                                                                         |
| <b>Pronated Foot Posture</b>                   | Foot Posture Index [35]                                                                          |
| <b>Lower Limb Biarticular muscle tightness</b> | Rectus femoris Length test [33]<br>Hamstrings length test [34]<br>Gastrocnemius length test [33] |

1  
2  
3  
4  
5  
6  
7  
8  
9  
10  
11  
12  
13  
14  
15  
16  
17  
18  
19  
20  
21  
22  
23  
24  
25  
26  
27  
28  
29  
30  
31  
32  
33  
34  
35  
36  
37  
38  
39  
40  
41  
42  
43  
44  
45  
46  
47  
48  
49  
50  
51  
52  
53  
54  
55  
56  
57  
58  
59  
60

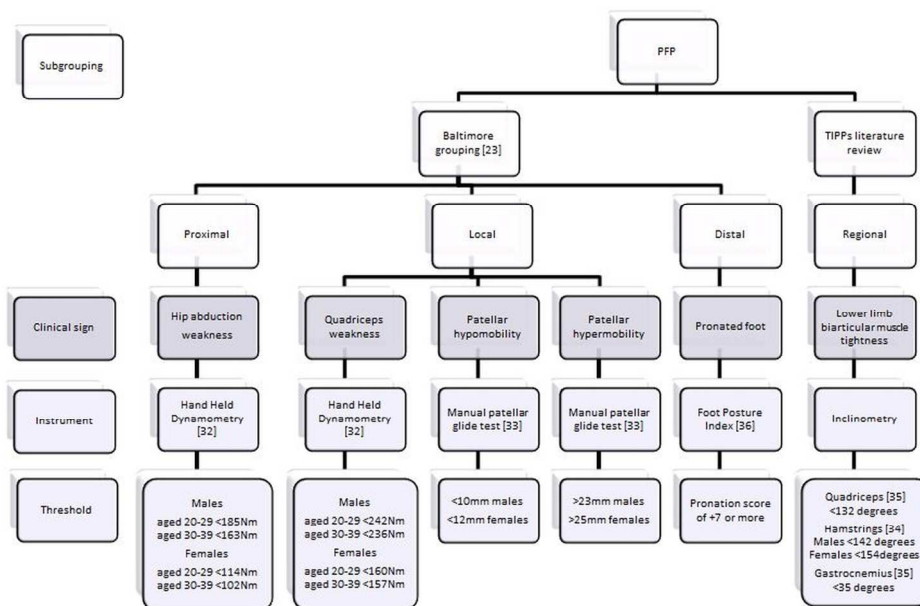

TIPPs Groups  
140x90mm (300 x 300 DPI)

Review only
